# Supplementary material for: RORα phosphorylation by casein kinase 1α as glucose signal to regulate estrogen sulfation in human liver cells
Source: Oxford University Press journal article supplement (doi:10.1042/bcj20200427), 2020-07-20
Supplement: bcj-2020-0427_supp1.pdf [file bcj-2020-0427_supp1.pdf]

## Supplementary Figures Legends

**Supplementary Figure 1. High glucose induces *SULT1E1* expression in HepG2 3D culture and Huh7 cells.** (A) HepG2 3D spheroids and (B) Huh7 cells were treated by low glucose and high glucose DMEM respectively for 48 hours, followed by measuring their *SULT1E1* mRNA expression levels. (D) HepG2 and Huh7 cell viabilities in response to low glucose and high glucose exposures for 48 hours were measured. The values (N = 3) represent means  $\pm$  S.D. Mean difference is significant from low glucose treated group at \*\*\*\*,  $p < 0.0001$ ; \*\*\*,  $p < 0.0005$  (Student's *t*-test).

**Supplementary Figure 2. HNF4 $\alpha$  activates while ROR $\alpha$  suppresses *SULT1E1* in Huh7 cells.** (A - B) HNF4 $\alpha$  was knocked down by siRNA in Huh7 cells, followed by low glucose and high glucose treatments respectively for 48 hours. *SULT1E1* and *HNF4 $\alpha$*  mRNA expression levels of these treated cells were subsequently detected. (C - D) ROR $\alpha$  was knocked down by siRNA in Huh7 cells, followed by low glucose and high glucose treatments respectively for 48 hours. *SULT1E1* and *ROR $\alpha$*  gene expressions of these treated cells were subsequently detected. The values (N = 3) represent means  $\pm$  S.D. Mean difference is significant from scramble siRNA transfected group \*\*\*\*,  $p < 0.0001$ ; \*\*\*,  $p < 0.0005$ ; \*,  $p < 0.05$  (Student's *t*-test).

**Supplementary Figure 3. ROR $\alpha$  S100D activates endogenous *SULT1E1* in HepG2 cells.** (A) Flag-tagged ROR $\alpha$  WT, ROR $\alpha$  S100A or ROR $\alpha$  S100D was transfected into HepG2 cells respectively for 24 hours, followed by measuring their *SULT1E1* mRNA expression levels. The values (N = 4) represent means  $\pm$  S.D. Mean difference is significant from empty vector transfected group at \*\*\*,  $p < 0.0005$  (One-way ANOVA). (B) The expression patterns of these

Flag-tagged ROR $\alpha$ s in the nuclei of transfected HepG2 cells were detected by western blotting with an anti-Flag antibody. Nuclear protein HDAC1 was used as a loading control.

**Supplementary Figure 4. ROR $\alpha$  interacting with HNF4 $\alpha$  binds to the *SULT1E1* gene.** (A)

*In vitro* translated Flag-tagged HNF4 $\alpha$ , ROR $\alpha$  WT, ROR $\alpha$  S100A and ROR $\alpha$  S100D were applied in the gel shift assays. The expression levels of these *in vitro* translated proteins were detected by western blotting with an anti-Flag antibody. (B) The radioactive labeled *SULT1E1* DR1\_RORE probe was incubated with HNF4 $\alpha$ , HNF4 $\alpha$ /ROR $\alpha$  WT mixture, HNF4 $\alpha$ /ROR $\alpha$  S100A mixture or HNF4 $\alpha$ /ROR $\alpha$  S100D mixture respectively. The formed complex (indicated by a solid arrow) was recognized by the antibodies against HNF4 $\alpha$  and ROR $\alpha$  respectively. Supershifted bands were indicated by a dashed arrow. A normal IgG was used as a control for the antibodies used in the assays. (C) Binding capacities of the *in vitro* translated ROR $\alpha$  WT, ROR $\alpha$  S100A and ROR $\alpha$  S100D to a consensus RORE were tested by gel shift assays.

**Supplementary Figure 5. Controls for 3C assays.** (A) The 3C target was sequenced, from

which the ligated point was displayed. (B) A non-coding region (from +7066 bp to +8570 bp) of the *SULT1E1* gene that has a similar size to the *SULT1E1* promoter was used as a negative control in the 3C assays. Primer set (TP3 and TP4, indicated by solid arrows) was used to amplify a 127 bp non-3C target from the glucose treated HepG2 cells. (C) The efficiency of the primer sets used in the 3C assays was validated by RT-PCR using purified fragments (3C target and Control) and synthesized DNA (Non-3C target) as templates.

**Supplementary Table 1. Glucose exposures alter xenobiotic metabolism in HepG2 cells.**

Microarray analysis of the glucose treated HepG2 cells. Gene expression analysis was conducted using Agilent Whole Human Genome 4 × 44 Version 2 multiplex format oligo arrays (026652) (Agilent Technologies) following the Agilent 1-color microarray-based gene expression analysis protocol. The values (N = 4) represent means ± S.D. Mean difference between low glucose treated group and high glucose treated group was compared by an ANOVA and Benjamini-Hochberg multiple test correction with a p-value of  $p < 0.05$ . Xenobiotic related genes that have a fold change (high glucose group/low glucose group) more than  $\pm 2$  were listed in the table. The data sets (accession: GSE140867) are accessible at GEO.

**Supplementary Table 2. Primers, oligonucleotides and probes used in the study.**

The primers, oligonucleotides and probes used for plasmid constructions, DNA affinity chromatography-mass spectrometry, qRT-PCR, EMSA, CHIP and 3C assays in the study are listed in the table. The mutated sequences are underlined.

Supplementary Figure 1

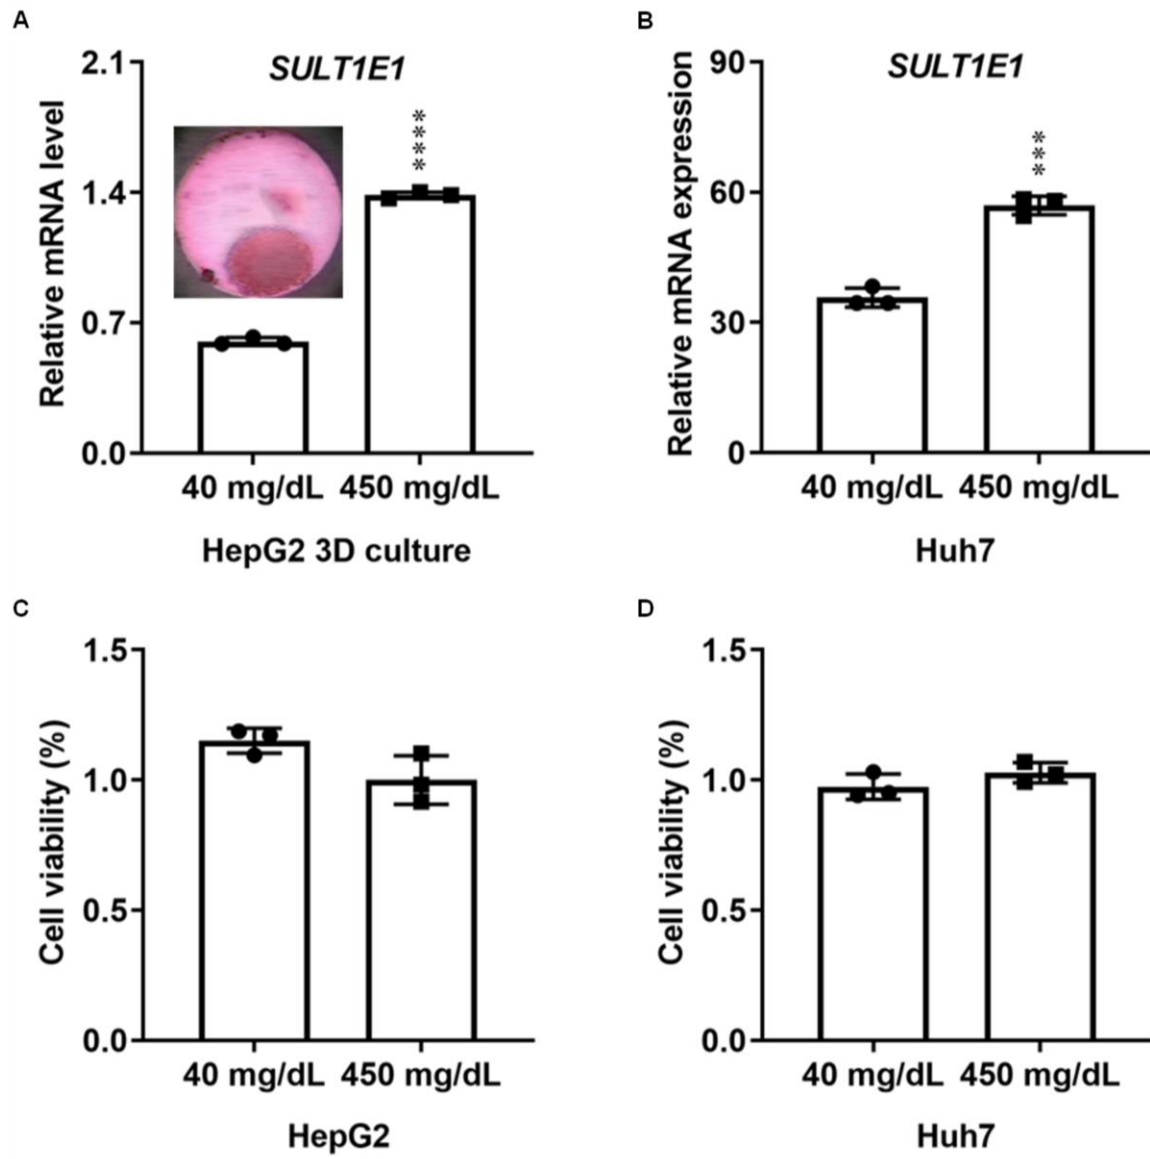

Supplementary Figure 2

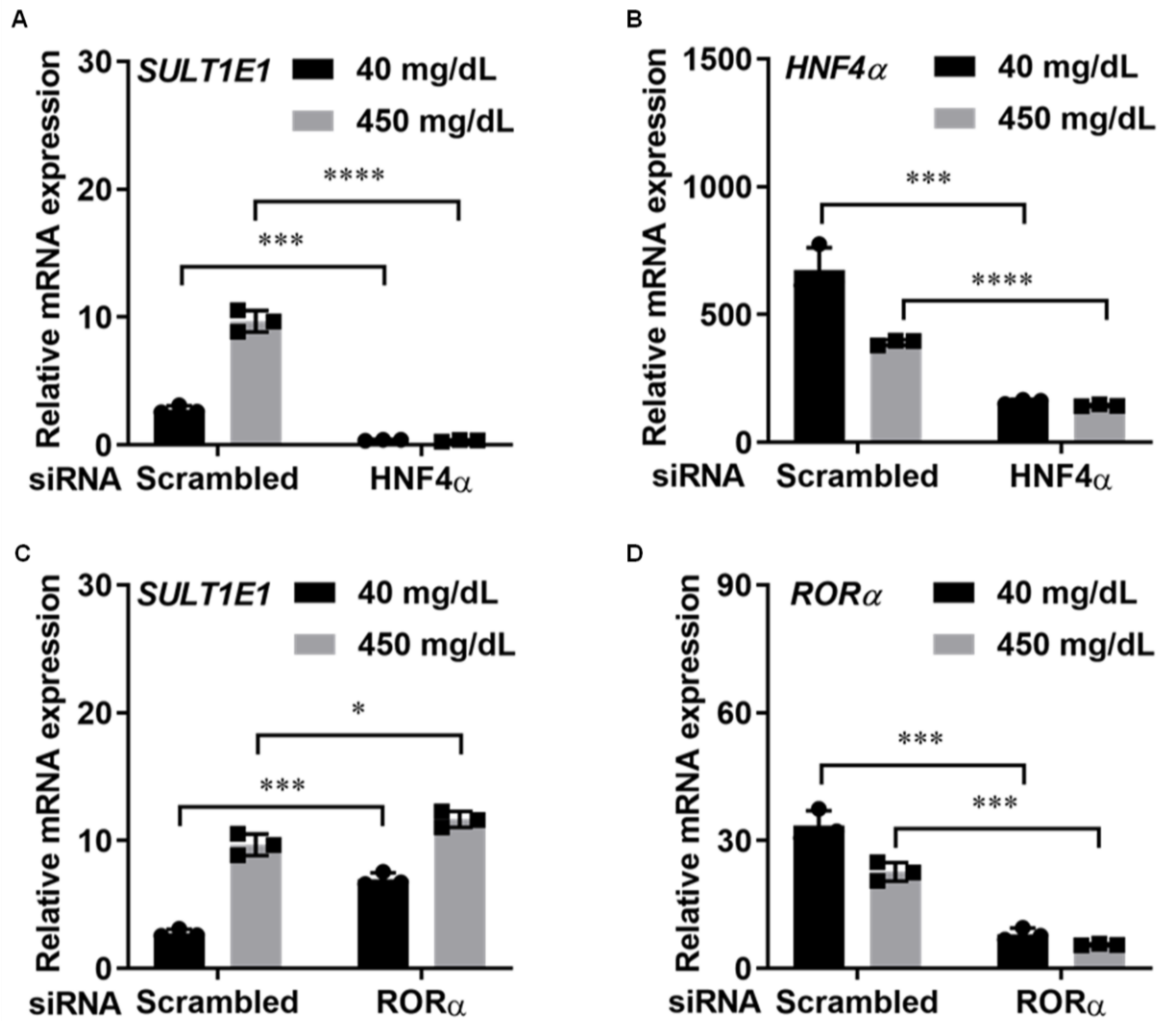

Supplementary Figure 3

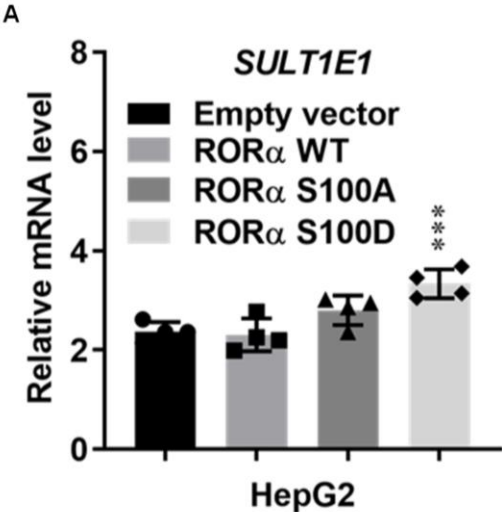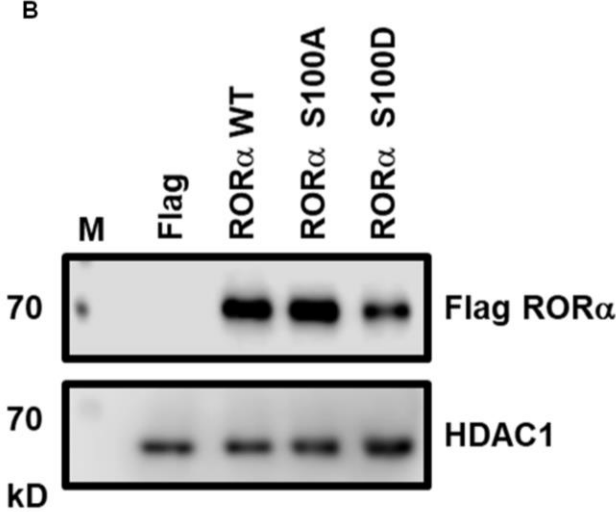



# Supplementary Figure 5

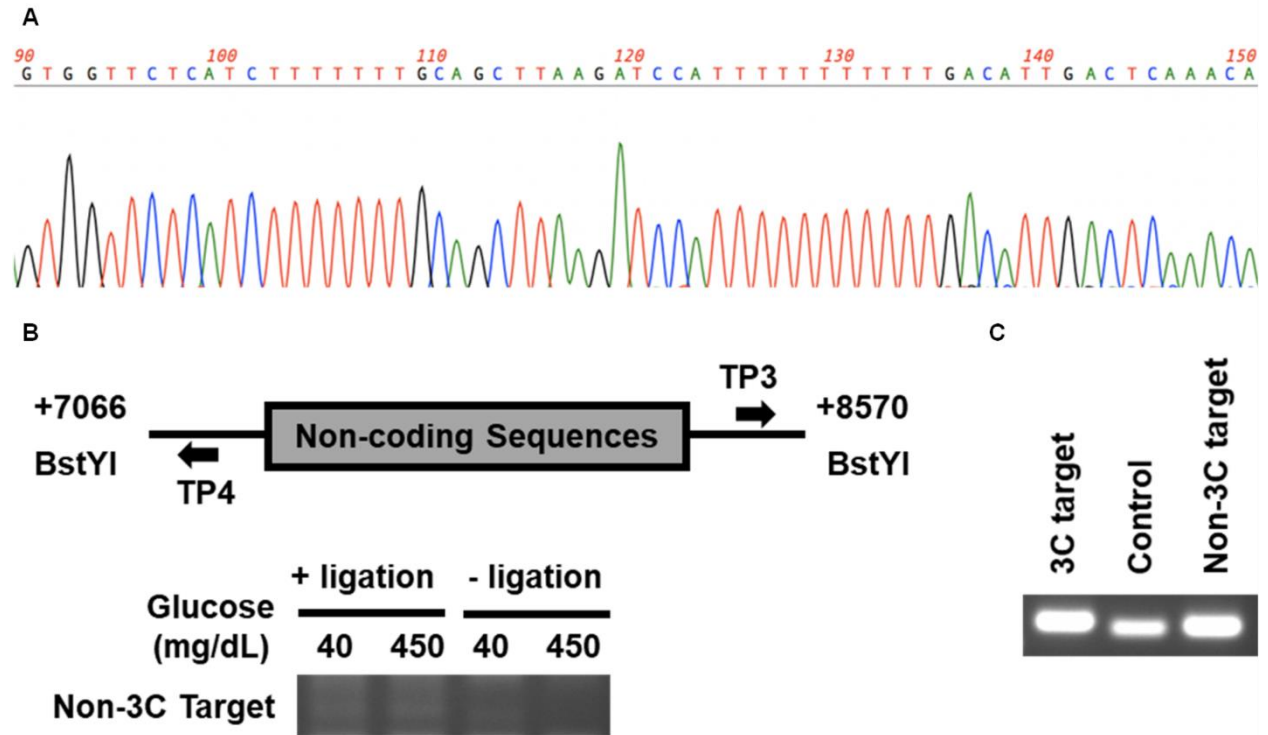



**Supplementary Table 1**

| <b>Name</b>    | <b>Fold Change*</b> | <b>p-value</b> |
|----------------|---------------------|----------------|
| <b>SULTs</b>   |                     |                |
| <b>SULT2A1</b> | 9.569               | 1.19E-12       |
| <b>SULT1E1</b> | 7.484               | 1.26E-05       |
| <b>SULT1B1</b> | 2.87                | 0.032          |
| <b>SULT1C2</b> | 2.597               | 7.53E-07       |
| <b>SULT1C4</b> | -2.1                | 0.0295         |
| <b>CYPs</b>    |                     |                |
| <b>CYP3A7</b>  | 3.721               | 4.87E-09       |
| <b>CYP3A5</b>  | 2.798               | 1.69E-05       |
| <b>CYP2D6</b>  | 2.3407              | 1.49E-05       |
| <b>CYP2U1</b>  | 2.3151              | 5.5645E-06     |
| <b>CYP4F3</b>  | 2.2599              | 2.6359E-07     |
| <b>CYP2R1</b>  | -2                  | 1.3834E-09     |
| <b>CYP2S1</b>  | -3.1089             | 0.0025         |
| <b>CYP1A1</b>  | -4.311              | 1.84E-09       |
| <b>CYP4F11</b> | -6.4977             | 1.9544E-11     |
| <b>UGTs</b>    |                     |                |
| <b>UGT2B11</b> | 2.843               | 1.89E-12       |
| <b>UGT2B15</b> | 2.595               | 5.53E-06       |
| <b>UGT2B10</b> | 2.419               | 1.03E-09       |
| <b>UGT2B7</b>  | 2.29                | 2.74E-07       |
| <b>GSTs</b>    |                     |                |
| <b>GSTM2</b>   | 16.404              | 2.64E-05       |
| <b>GSTM4</b>   | 5.076               | 7.74E-09       |
| <b>GSTO2</b>   | 3.356               | 1.43E-10       |
| <b>MGST2</b>   | 2.748               | 1.22E-12       |
| <b>GSTA4</b>   | 2.426               | 2.24E-10       |
| <b>GSTT1</b>   | 2.343               | 2.41E-11       |
| <b>GSTK1</b>   | 2.341               | 2.24E-09       |
| <b>MGST1</b>   | -2.836              | 2.4E-12        |
| <b>GSTA2</b>   | -3.947              | 5.5E-11        |
| <b>GSTA5</b>   | -5.966              | 2.33E-08       |

\* Fold change represents high glucose group/low glucose group.

## Supplementary Table 2

### Construction of mutant *SULT1E1* promoters

|                                |                                                                                                                                                                                                               |
|--------------------------------|---------------------------------------------------------------------------------------------------------------------------------------------------------------------------------------------------------------|
| $\Delta$ -1081 DR1 mutant      | 5'-TGATTTACAACACAGTAAAATAAATACTAGTTAGGAGAAAGTTTGGATTTAAAAGTCACTAAGAGAAACATAACATCTACATTA ACTATT-3'<br>5'-AATAGTTAATGTAGATGTTATGTTTCTCTTAGTGACTTTTAAATCCC<br>AAACTTTCTCCTAACTAGTATTTATTTTACTGTGTTGTAAATCA-3'    |
| $\Delta$ -1081 RORE mutant     | 5'-TGATTTACAACACAGTAAAATAAATACTAGTTAGGAGAAAGTTCA<br>AAGTTTAAGGACTACTAAGAGAAACATAACATCTACATTA ACTAT-3'<br>5'-ATAGTTAATGTAGATGTTATGTTTCTCTTAGTAGTCCTTAAACTTTG<br>AACTTTCTCCTAACTAGTATTTATTTTACTGTGTTGTAAATCA-3' |
| $\Delta$ -1081 DR1_RORE mutant | 5'-ACAGTAAAATAAATACTAGTTAGGAGAAAGTTTGGGATTTAAGGA<br>CTACTAAGAGAAACATAACATCTACATTA ACTATTGCATC-3'<br>5'-GATGCAATAGTTAATGTAGATGTTATGTTTCTCTTAGTAGTCCTTAA<br>ATCCCAA ACTTTCTCCTAACTAGTATTTATTTTACTGT-3'          |

### Construction of HNF4 $\alpha$ expression plasmid

|                  |                                          |
|------------------|------------------------------------------|
| HNF4 $\alpha$ _F | 5'-ATCATTAAAGCTTATGCGACTCCAAAACCC-3'     |
| HNF4 $\alpha$ _R | 5'-ATCATTGGATCCCTAGATAACTTCCTGCTTGGTG-3' |

### Oligonucleotides for DNA affinity chromatography-mass spectrometry

|                       |                                                                                                                                                                      |
|-----------------------|----------------------------------------------------------------------------------------------------------------------------------------------------------------------|
| 4 $\times$ DR1_RORE_F | 5'-CTAGGAGAAAGTTCAAAGTTTAAAAGTCACTAAGATAGGAGA<br>AAGTTCAAAGTTTAAAAGTCACTAAGATAGGAGAAAGTTCAAAG<br>TTAAAAGTCACTAAGATAGGAGAAAGTTCAAAGTTTAAAAGTC<br>ACTAAGAG-3'          |
| 4 $\times$ DR1_RORE_R | 5'-GATCCTCTTAGTGACTTTTAAACTTTGAACTTTCTCCTATCTTA<br>GTGACTTTTAAACTTTGAACTTTCTCCTATCTTAGTGACTTTTAAA<br>CTTTGAACTTTCTCCTATCTTAGTGACTTTTAAACTTTGAACTTTC<br>TCCTAGGTAC-3' |
| 4 $\times$ 1E1_F      | 5'-AAGTTGGCCGCAGTGTTATC-3'                                                                                                                                           |
| 4 $\times$ 1E1_R      | 5'-TGGGCGGGGCCAGATCC-3'                                                                                                                                              |

### Assay on demand primers

|                     |               |
|---------------------|---------------|
| Human SULT1E1       | Hs00193690_m1 |
| Human STS           | Hs00996676_m1 |
| Human TFF1          | Hs00907239_m1 |
| Human HNF4 $\alpha$ | Hs00230853_m1 |
| Human ROR $\alpha$  | Hs00536545_m1 |
| Human ACTB          | Hs99999903_m1 |

---

**EMSA probes**

---

|                   |                                                                                              |
|-------------------|----------------------------------------------------------------------------------------------|
| DR1_RORE          | 5'-GATCTAGGAGAAAGTTCAAAGTTTAAAAGTCACTAAGA-3'<br>5'-GATCTCTTAGTGACTTTTAAACTTTGAACTTTCTCCTA-3' |
| DR1               | 5'-GATCAGGAGAAAGTTCAAAGTTTAAAA-3'<br>5'-GATCTTTTAAACTTTGAACTTTCTCCT-3'                       |
| RORE              | 5'-GATCTCAAAGTTTAAAAGTCACTAAGA-3'<br>5'-GATCTCTTAGTGACTTTTAAACTTTGA-3'                       |
| Consensus<br>RORE | 5'-GATCTCGACTCGTATATCAAGGTCATGCTG-3'<br>5'-GATCCAGCATGACCTTGATATACGAGTCGA-3'                 |

---

**ChIP assay primers**

---

|                    |                              |
|--------------------|------------------------------|
| SULT1E1 enhancer_F | 5'-AAAGTACTCTGGACAAGCAAAC-3' |
| SULT1E1 enhancer_R | 5'-GAGGCTCACTCTTACAAGACTC-3' |

---

**3C assay primers**

---

|                           |                                                                                                                                              |
|---------------------------|----------------------------------------------------------------------------------------------------------------------------------------------|
| Control (CP1)_F           | 5'-CTCTGGACAAGCAAACATTGA-3'                                                                                                                  |
| Control (CP2)_R           | 5'-CATTTCCTTTGAGAGGCTCACTC-3'                                                                                                                |
| Ligated (TP1)_F           | 5'-TCACCAGAAACATTCCAAATGCAG-3'                                                                                                               |
| Ligated (TP2)_R           | 5'-CTGAAACCTCATTCTTCTCCATGA-3'                                                                                                               |
| Ligated (TP3)_F           | 5'-TGGCTGGGTCAAATGGTATT-3'                                                                                                                   |
| Ligated (TP4)_R           | 5'-GCATGGAATGACTTCAGCAG-3'                                                                                                                   |
| Non-3C target<br>template | 5'-TGGCTGGGTCAAATGGTATTTCTAGTTCTAGATCTACAGACAA<br>AAATCAAAGATTGCCAGGTTAGTTTGTTTTATCATTAGCAATCC<br>TAGATAGACGATATACGTCCTGCTGAAGTCATTCCATGC-3' |

---

Mutated sequences are underlined
